# Supplementary material for: Phenyl-rich silicone oil as a precursor for SiOC anode materials for long-cycle and high-rate lithium ion batteries
Source: Royal Society of Chemistry journal article supplement (doi:10.1039/c5ta09973k), 2016-01-01
Supplement: c5ta09973k1.pdf [file c5ta09973k1.pdf]

## Supporting Information

### Phenyl-Rich Silicone Oil as a Precursor for SiOC Anode Materials in Long-Cycle and High-Rate Lithium Ion Batteries

Martin Halim, ‡<sup>a,b</sup> Chairul Hudaya, ‡<sup>a,b,c</sup> A-Young Kim<sup>a,d</sup> and Joong Kee Lee<sup>\*a,b</sup>

<sup>a</sup>Center for Energy Convergence, Korea Institute of Science and Technology, Seoul 02792, Republic of Korea. E-mail: leejk@kist.re.kr

<sup>b</sup>Energy and Environmental Engineering, Korea University of Science and Technology, Daejeon 34113, Republic of Korea.

<sup>c</sup>Department of Electrical Engineering, Faculty of Engineering, Universitas Indonesia, Depok 16421, Republic of Indonesia.

<sup>d</sup>Department of Material Science and Engineering, Korea University, Seoul 02841, Republic of Korea.

‡These authors contributed equally to this work

\*Email : leejk@kist.re.kr

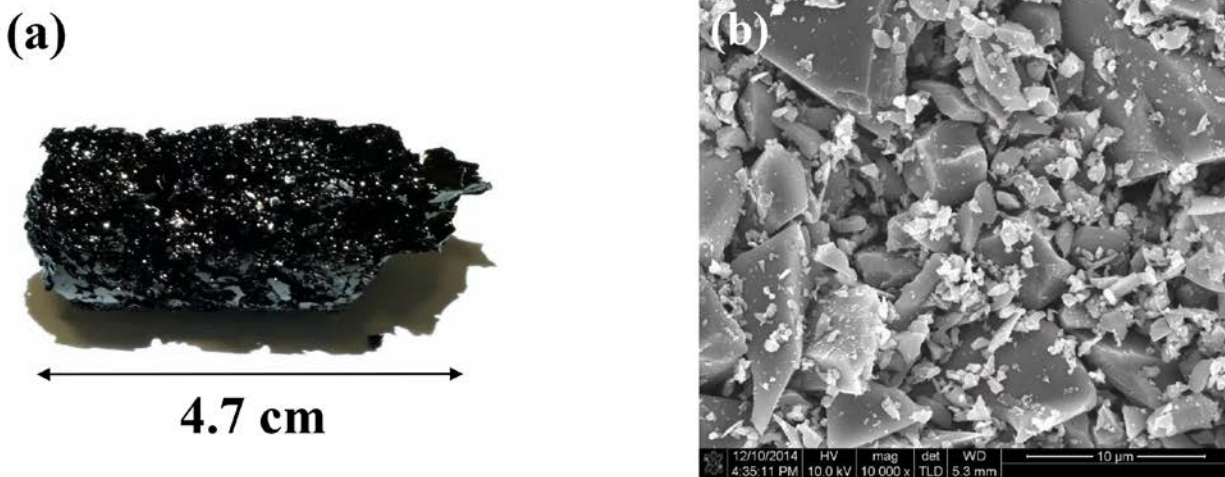

**Fig. S1.** (a) Digital image of the resulting SiOC after pyrolysis method. (b) SEM image of the SiOC after pulverization. The resulting SiOC after pyrolysis was a solid dense block. The SiOC was then pulverized with ball milling for 1 hour to get a fine powder.

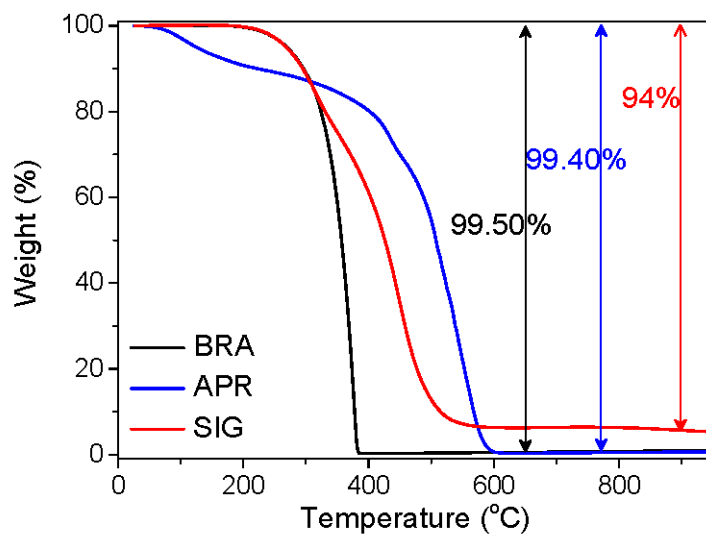

**Fig. S2.** Thermogravimetric analysis (TGA) of silicone oil precursors from three different suppliers: BRA, APR, SIG.

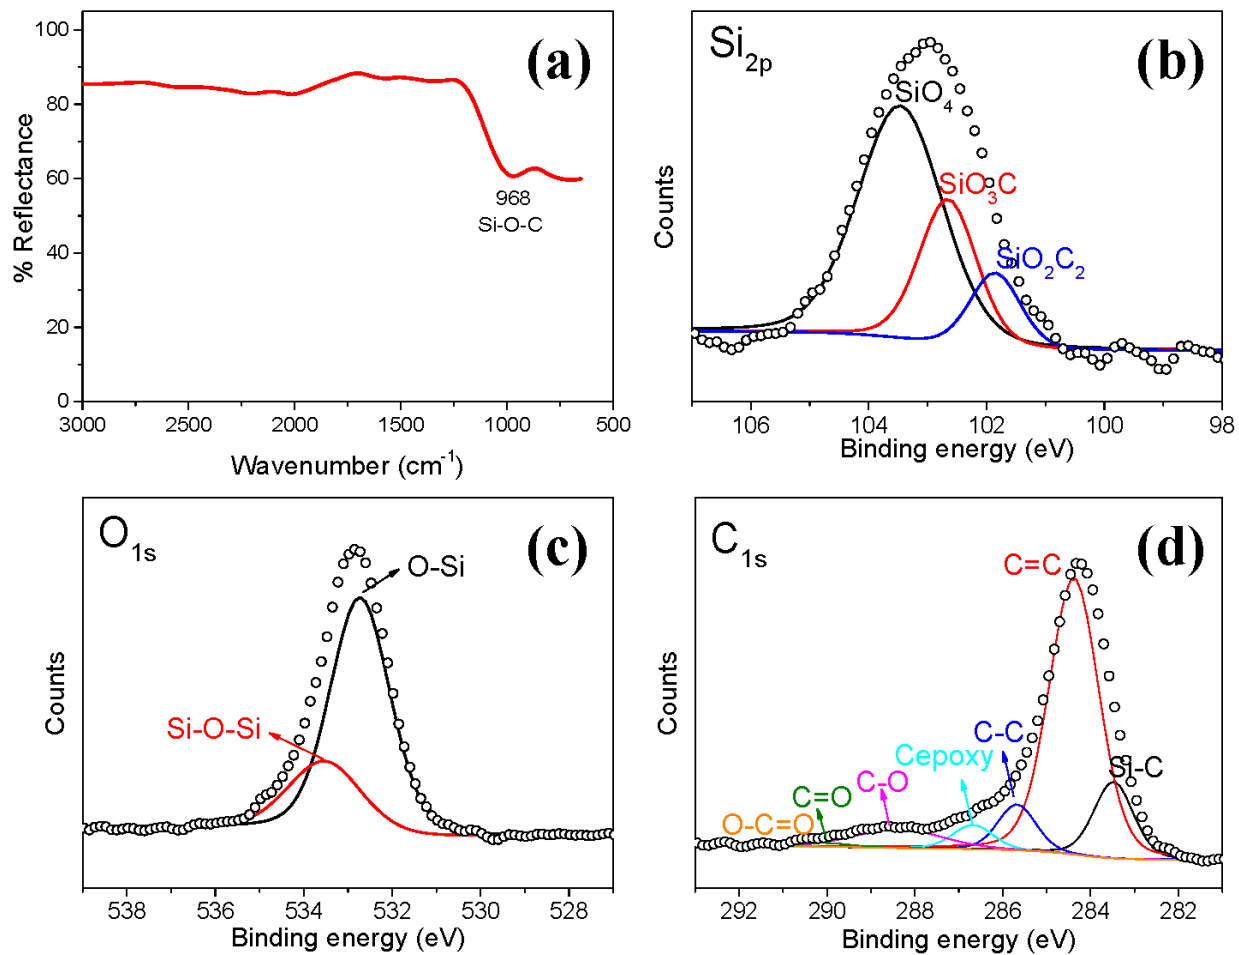

**Fig. S3.** Chemical bonding confirmation in SiOC by (a) FTIR and X-ray photoelectron spectroscopy (XPS) spectra of SiOC (b)  $\text{Si}_{2p}$ , (c)  $\text{O}_{1s}$ , and (d)  $\text{C}_{1s}$ .

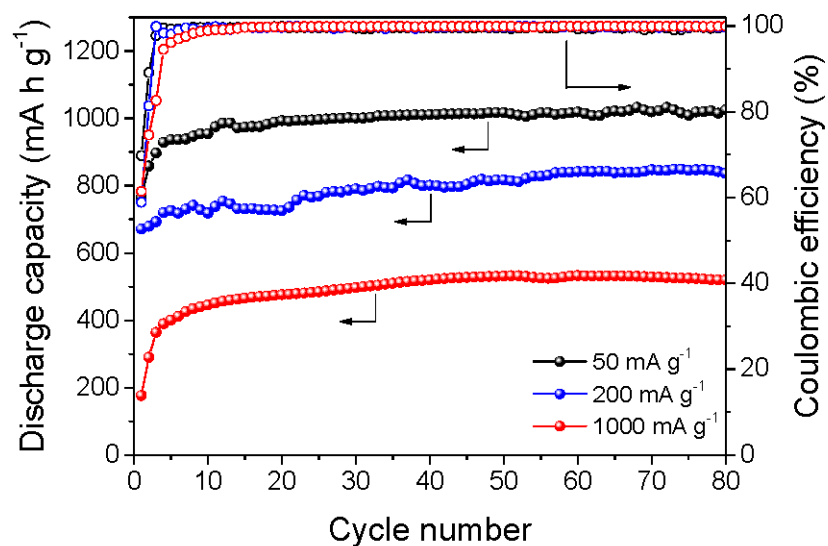

**Fig. S4.** Galvanostatic cycle performance of SiOC at varied current densities, 50, 200 and 1000 mA g<sup>-1</sup>.

### Calculation of Li<sup>+</sup> Diffusion Coefficient

Lithium diffusion coefficient ( $D_{Li^+}$ ) within SiOC anode material is calculated based on the Randles-Sevcik equation:

$$i = 2.69 \times 10^5 n^{1.5} A D_{Li^+}^{0.5} C_{Li} \nu^{0.5}$$

where,  $i$  is the peak current (A),  $n$  is the number of electrons per species reaction (1 for lithium ion),  $A$  is the electrode surface area (1.131 cm<sup>2</sup>),  $D_{Li^+}$  is the lithium ion coefficient within the SiOC anode material,  $\nu$  is the potential scan rates and  $C_{Li}$  is the lithium concentration in electrolyte (10<sup>-3</sup> mol cm<sup>-3</sup>). The value of  $i$  and  $\nu^{0.5}$  can be obtained from the cyclic voltammetry in Fig. S5a. The relationship of  $i$  and  $\nu^{0.5}$  is expressed in the linear equation as shown in Fig. S5b. Further, the gradient obtained in Fig. S5b is used to determine the value of lithium diffusion coefficient ( $D_{Li^+}$ ) within SiOC.

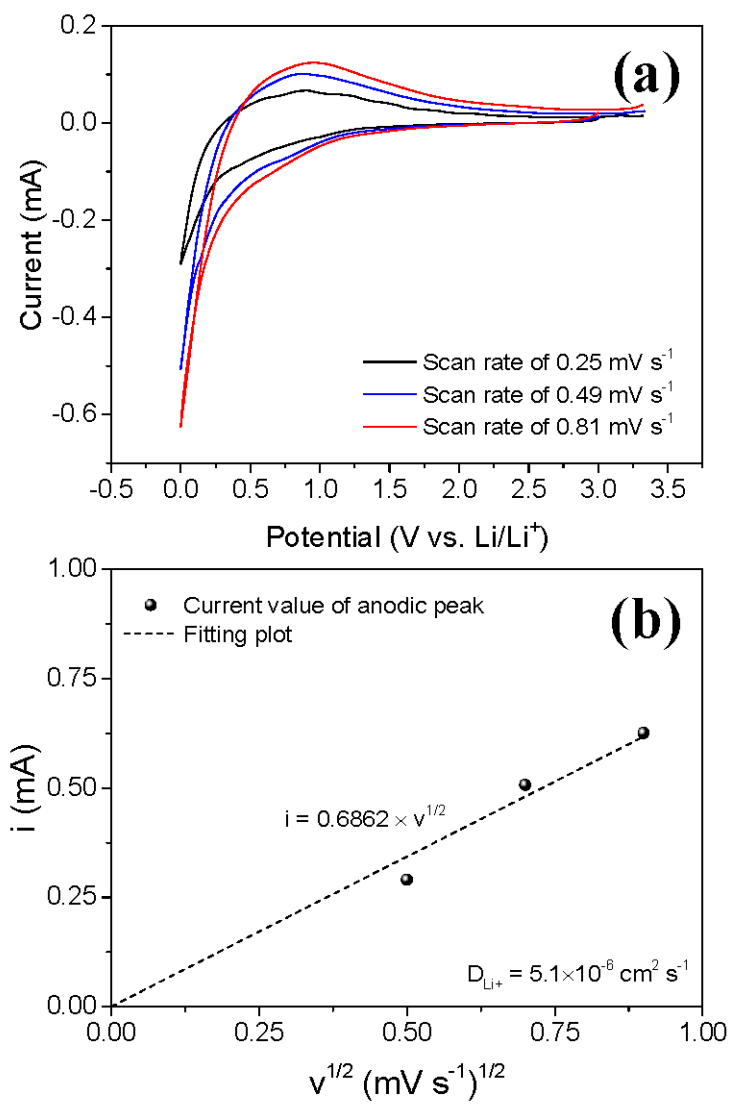

**Fig. S5.** (a) Cyclic voltammety profile of SiOC at varied scan rates. (b) Plot of the peak current and square root of the scan rate of the SiOC anode materials.

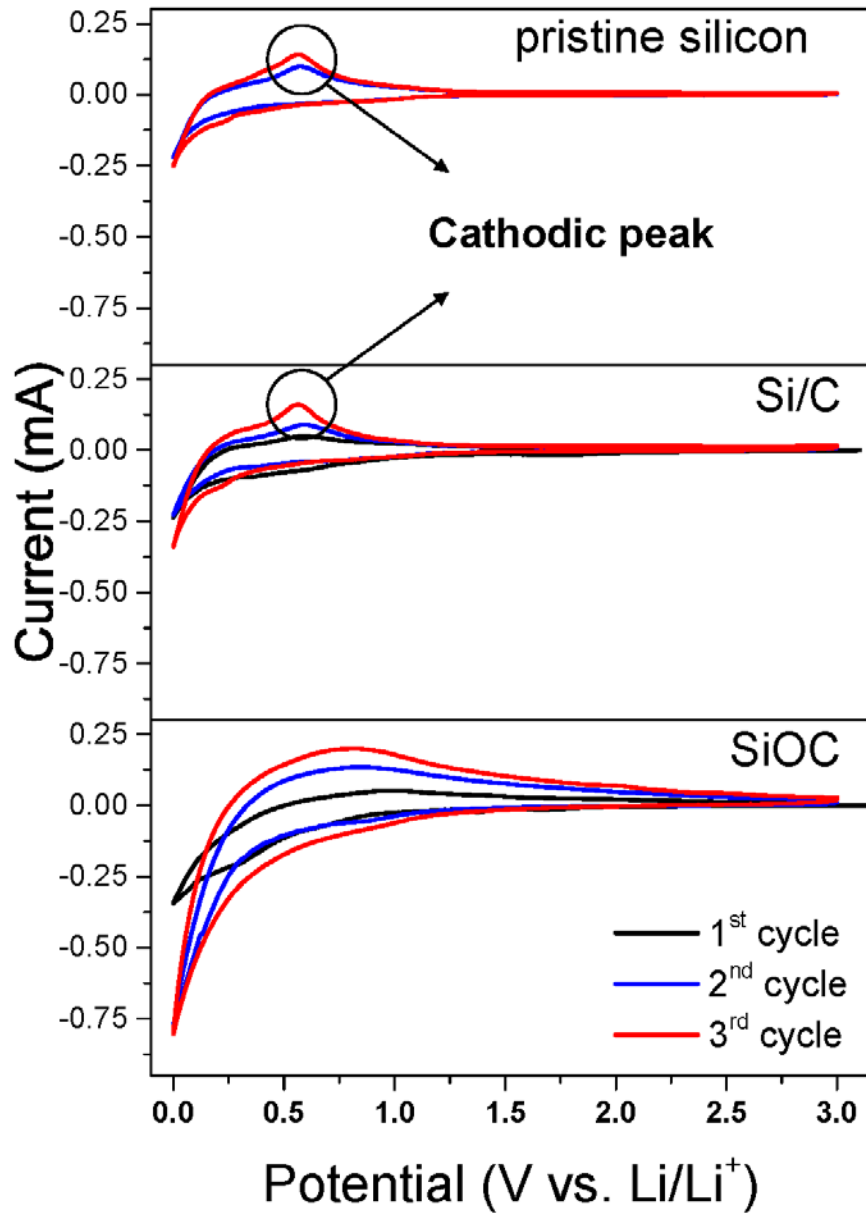

**Fig. S6.** Cyclic voltammetry (CV) profiles of (a) pristine Si microparticle, (b) Si/C composite, and (c) SiOC at the scan rate of  $0.2 \text{ mV s}^{-1}$  and cut-off voltage of 0.001 – 3.0 V.

**Table S1.** Material composition and mass ratio (%) of SiOC by X-ray fluorescence (XRF) analysis.

| No | Component | Result (mass %) |
|----|-----------|-----------------|
| 1  | Si        | 59              |
| 2  | Fe        | 0.0033          |
| 3  | Ni        | 0.0061          |
| 4  | Zr        | 0.0166          |
| 5  | C         | 39.9            |
| 6  | H         | 1.1             |

Material composition of SiOC mostly consists of Si and C (6:4). Meanwhile, the Fe, Ni, and Zr might come from the trace impurities in the precursor and from the pulverization process using ball milling.

**Table S2.** Electrochemical performance of SiOC anode materials in lithium ion batteries prepared by using different precursors

| Published Year | SiOC Precursor                                                                                  | Current density               | Discharge capacity |                         | Reference        |
|----------------|-------------------------------------------------------------------------------------------------|-------------------------------|--------------------|-------------------------|------------------|
|                |                                                                                                 |                               |                    | (mA h g <sup>-1</sup> ) |                  |
| -              | <b>Silicone oil</b>                                                                             | <b>50 mA g<sup>-1</sup></b>   | <b>1050</b>        | <b>80</b>               | <b>this work</b> |
|                |                                                                                                 | <b>200 mA g<sup>-1</sup></b>  | <b>800</b>         | <b>250</b>              | <b>this work</b> |
|                |                                                                                                 | <b>1000 mA g<sup>-1</sup></b> | <b>520</b>         | <b>80</b>               | <b>this work</b> |
| 2015           | Polyhydridomethylsiloxane (PHMS) + divinylbenzene (DVB) + platinum divinyltetramethyldisiloxane | 360 mA g <sup>-1</sup>        | 600                | 50                      | [1]              |
| 2013           | polyorganosiloxane (Polyramic® RD-684)                                                          | 37 mA g <sup>-1</sup>         | 666                | 10                      | [2]              |
| 2012           | polyorganosiloxane (Polyramic® RD-684)                                                          | 37 mA g <sup>-1</sup>         | 532                | 10                      | [3]              |
| 2012           | polyhydridomethylsiloxane (PHMS)                                                                | 18 mA g <sup>-1</sup>         | 190                | 10                      | [4]              |
| 2011           | Tetramethyl-tetravinylcyclotetrasiloxane + dicumyl peroxide                                     | 100 mA g <sup>-1</sup>        | 637                | 60                      | [5]              |
| 2009           | Graphene oxide + polyhydrodimethylsiloxane (PHMS)                                               | 40 mA g <sup>-1</sup>         | 357                | 20                      | [6]              |
| 2005           | polysiloxanes                                                                                   | 0.15 mA cm <sup>-2</sup>      | 550                | 10                      | [7]              |
| 1999           | pitch + polyphenylmethyl silane                                                                 | -                             | 500                | 2                       | [8]              |
| 1994           | polymethylphenylsiloxane (Dow 710 fluid)                                                        | 74 mA g <sup>-1</sup>         | 380                | 25                      | [9]              |



## References

- [1] V. S. Pradeep, D. G. Ayana, M. G.-Zajac, G. D. Soraru and R. Riedel, *Electrochim. Acta*, 2015, **157**, 41-45.
- [2] J. Kaspar, M. Graczyk-Zajac and R. Riedel, *J. Power Sources*, 2013, **244**, 450-455.
- [3] J. Kaspar, M. Graczyk-Zajac and R. Riedel, *Solid State Ionics*, 2012, **225**, 527-531.
- [4] P. Dibandjo, M. Graczyk-Zajac, R. Riedel, V. S. Pradeep and G. D. Soraru, *J. Eur. Ceram. Soc.*, 2012, **32**, 2495-2503.
- [5] D. Ahn and R. Raj, *J. Power Sources*, 2011, **196**, 2179-2186.
- [6] F. Ji, Y. L. Li, M. Feng, D. Su, Y. Y. Wen, Y. Feng and F. Hou, *J. Mater. Chem.*, 2009, **19**, 9063-9067.
- [7] L. J. Ning, Y. P. Wu, L. Z. Wang, S. B. Fang and R. Holze, *J. Solid State Electrochem.*, 2005, **9**, 520-523.
- [8] D. Larcher, C. Mudalige, A. E. George, V. Porter, M. Gharghoury and J. R. Dahn, *Solid State Ionics*, 1999, **122**, 71-83.
- [9] A. M. Wilson, J. N. Reimers, E. W. Fuller and J. R. Dahn, *Solid State Ionics*, 1994, **74**, 249-254.
